# Supplementary material for: Lessons from polio eradication: a synthesis of implementation strategies for global health services delivery from a scoping review
Source: Front Health Serv. 2024 Aug 7;4:1287554. doi: 10.3389/frhs.2024.1287554 (PMC11335730; doi:10.3389/frhs.2024.1287554)
Supplement: Supplementary File S4 — PRISMA checklist. [file Datasheet4.docx]

**Results of inter-rater reliability statistics**

This brief report summarizes the results of the inter-rater reliability tests for the study described in *Lessons from Polio Eradication: A**synthesis of implementation strategies for global health services delivery from a scoping review*. The review comprised of 28 articles by 4 individual raters across 392 variables in the abstraction tool. Analyses were conducted in Stata (14.2).1

1. **Overall inter-rater reliability statistics**

**kappaetc v1-v111 , benchmark showscale**

**Interrater agreement Number of subjects = 392**

**Ratings per subject: min= 7**

**avg = 108.8**

**max = 111**

**Number of rating categories= 44**

**P cum. Probabilistic**

**Coef. Std.Err.P in. >95% [Benchmark Interval]**

**Percent Agreement 0.8623 0.0096 1.00 1.000 0.8000 1.0000**

**Brennan and Prediger 0.8591 0.0098 1.00 1.000 0.8000 1.0000**

**Cohen/Conger's Kappa 0.4781 0.0312 0.99 0.994 0.4000 0.6000**

**Scott/Fleiss' Kappa 0.5264 0.0270 1.00 1.000 0.4000 0.6000**

**Gwet's AC 0.8613 0.0097 1.00 1.000 0.8000 1.0000**

**Krippendorff's Alpha 0.5046 0.0294 1.00 1.000 0.4000 0.6000**

**Benchmark scale**

**<0.0000 Poor**

**0.0000-0.2000 Slight**

**0.2000-0.4000 Fair**

**0.4000-0.6000 Moderate**

**0.6000-0.8000 Substantial**

**0.8000-1.0000 Almost Perfect**

For all the 392 variables and across the multiple raters (we assume independence of raters and articles) for all articles, the overall percent agreement was **86%, implying almost perfect agreement** among raters based on the benchmark scale without accounting for agreement due to chance. The agreements that correct for chance ranged from 53% (Fleiss’ Kappa) to 86% (Gwet’s agreement coefficient). Gwet’s AC corrects for missing values, adjusts for the high agreement-low kappa paradox that is characteristic of Cohen’s and Fleiss’ kappa and incorporates the metric differences in Krippendorff’s alpha to accommodate different data types.2,3 It has been recommended for reporting the inter-rater reliability among multiple raters in health research as it provides more stable estimates.4 In this analysis, Gwet’s AC of 86% indicates overall almost perfect agreement among raters.4

1. **Inter-rater reliability statistics by article reviewed**

Some of the articles were selected randomly to evaluate agreement by article.

|  | Article #423 | | Article #523 | | Article #788 | | Article #927 | | Article #1274 | |
| --- | --- | --- | --- | --- | --- | --- | --- | --- | --- | --- |
|  | Coef | Probabilistic (Benchmark Interval) | Coef | Probabilistic (Benchmark Interval) | Coef | Probabilistic (Benchmark Interval) | Coef | Probabilistic (Benchmark Interval) | Coef | Probabilistic (Benchmark Interval) |
| Percent Agreement | **0.97** | **(0.80 – 1.00)** | **0.99** | **(0.80 – 1.00)** | **0.97** | **(0.80 – 1.00)** | **0.98** | **(0.80 – 1.00)** | **0.98** | **(0.80 – 1.00)** |
| Gwet’s AC | **0.97** | **(0.80 – 1.00)** | **0.99** | **(0.80 – 1.00)** | **0.97** | **(0.80 – 1.00)** | **0.98** | **(0.80 – 1.00)** | **0.98** | **(0.80 – 1.00)** |
|  | | | | | | | | |  |  |
|  | Article #1645 | | Article #1829 | | Article #1945 | | Article #2074 | | Article #2118 | |
|  | Coef | Probabilistic (Benchmark Interval) | Coef | Probabilistic (Benchmark Interval) | Coef | Probabilistic (Benchmark Interval) | Coef | Probabilistic (Benchmark Interval) | Coef | Probabilistic (Benchmark Interval) |
| Percent Agreement | **0.98** | **(0.80 – 1.00)** | **0.96** | **(0.80 – 1.00)** | **0.97** | **(0.80 - 1.00)** | **0.93** | **(0.80 – 1.00)** | **0.96** | **(0.80 – 1.00)** |
| Gwet’s AC | **0.97** | **(0.80 – 1.00)** | **0.96** | **(0.80 – 1.00)** | **0.97** | **(0.60 - 0.80)** | **0.93** | **(0.80 – 1.00)** | **0.96** | **(0.80 – 1.00)** |

**Benchmark scale**

**<0.0000 Poor**

**0.0000-0.2000 Slight**

**0.2000-0.4000 Fair**

**0.4000-0.6000 Moderate**

**0.6000-0.8000 Substantial**

**0.8000-1.0000 Almost Perfect**

Across articles, percent agreement of raters and the chance-corrected Gwet’s AC among raters ranged from 93% in article #2074 to 99% in article #523.

1. **Inter-rater reliability statistics by specific variables**
   1. **Q16 - strategies:** All articles reviewed were restricted to agreement on implementation strategies selected. Percent agreement of raters was perfect (1.0) across articles, except article #2074 where agreement was 0.75. The chance-corrected Gwet’s AC among raters also showed perfect agreement among raters and across articles, except article #2074 with 0.64 agreement.

|  | Article #423 | | Article #523 | | Article #788 | | Article #927 | | Article #1274 | |
| --- | --- | --- | --- | --- | --- | --- | --- | --- | --- | --- |
|  | Coef | Probabilistic (Benchmark Interval) | Coef | Probabilistic (Benchmark Interval) | Coef | Probabilistic (Benchmark Interval) | Coef | Probabilistic (Benchmark Interval) | Coef | Probabilistic (Benchmark Interval) |
| Percent Agreement | **1.00** | **(0.80 – 1.00)** | **1.00** | **(0.80 – 1.00)** | **1.00** | **(0.80 – 1.00)** | **1.00** | **(0.80 – 1.00)** | **1.00** | **(0.80 – 1.00)** |
| Gwet’s AC | **1.00** | **(0.80 – 1.00)** | **1.00** | **(0.80 – 1.00)** | **1.00** | **(0.80 – 1.00)** | **1.00** | **(0.80 – 1.00)** | **1.00** | **(0.80 – 1.00)** |
|  | | | | | | | | |  |  |
|  | Article #1645 | | Article #1829 | | Article #1945 | | Article #2074 | | Article #2118 | |
|  | Coef | Probabilistic (Benchmark Interval) | Coef | Probabilistic (Benchmark Interval) | Coef | Probabilistic (Benchmark Interval) | Coef | Probabilistic (Benchmark Interval) | Coef | Probabilistic (Benchmark Interval) |
| Percent Agreement | **1.00** | **(0.80 – 1.00)** | **1.00** | **(0.80 – 1.00)** | **1.00** | **(0.80 – 1.00)** | **0.75** | **(0.60 – 0.80)** | **1.00** | **(0.80 – 1.00)** |
| Gwet’s AC | **1.00** | **(0.80 – 1.00)** | **1.00** | **(0.80 – 1.00)** | **1.00** | **(0.80 – 1.00)** | **0.64** | **(0.60 – 0.80)** | **1.00** | **(0.80 – 1.00)** |

**Benchmark scale**

**<0.0000 Poor**

**0.0000-0.2000 Slight**

**0.2000-0.4000 Fair**

**0.4000-0.6000 Moderate**

**0.6000-0.8000 Substantial**

**0.8000-1.0000 Almost Perfect**

- 1. **Q42 - methods**

All articles reviewed were restricted to agreement on study methods selected. Percent agreement of raters was perfect (1.0) across articles, except article #2074 where agreement was 0.75. The chance-corrected Gwet’s AC among raters similarly showed perfect agreement among raters across articles, except article #2074 with 0.64 agreement.

|  | Article #423 | | Article #523 | | Article #788 | | Article #927 | | Article #1274 | |
| --- | --- | --- | --- | --- | --- | --- | --- | --- | --- | --- |
|  | Coef | Probabilistic (Benchmark Interval) | Coef | Probabilistic (Benchmark Interval) | Coef | Probabilistic (Benchmark Interval) | Coef | Probabilistic (Benchmark Interval) | Coef | Probabilistic (Benchmark Interval) |
| Percent Agreement | **1.00** | **(0.80 – 1.00)** | **1.00** | **(0.80 – 1.00)** | **1.00** | **(0.80 – 1.00)** | **1.00** | **(0.80 – 1.00)** | **1.00** | **(0.80 – 1.00)** |
| Gwet’s AC | **1.00** | **(0.80 – 1.00)** | **1.00** | **(0.80 – 1.00)** | **1.00** | **(0.80 – 1.00)** | **1.00** | **(0.80 – 1.00)** | **1.00** | **(0.80 – 1.00)** |
|  | | | | | | | | |  |  |
|  | Article #1645 | | Article #1829 | | Article #1945 | | Article #2074 | | Article #2118 | |
|  | Coef | Probabilistic (Benchmark Interval) | Coef | Probabilistic (Benchmark Interval) | Coef | Probabilistic (Benchmark Interval) | Coef | Probabilistic (Benchmark Interval) | Coef | Probabilistic (Benchmark Interval) |
| Percent Agreement | **1.00** | **(0.80 – 1.00)** | **1.00** | **(0.80 – 1.00)** | **1.00** | **(0.80 – 1.00)** | **0.75** | **(0.60 – 0.80)** | **1.00** | **(0.80 – 1.00)** |
| Gwet’s AC | **1.00** | **(0.80 – 1.00)** | **1.00** | **(0.80 – 1.00)** | **1.00** | **(0.80 – 1.00)** | **0.64** | **(0.60 – 0.80)** | **1.00** | **(0.80 – 1.00)** |

**Benchmark scale**

**<0.0000 Poor**

**0.0000-0.2000 Slight**

**0.2000-0.4000 Fair**

**0.4000-0.6000 Moderate**

**0.6000-0.8000 Substantial**

**0.8000-1.0000 Almost Perfect**

- 1. **Q45 – study type**

All articles reviewed were restricted to agreement on study type selected. Percent agreement of raters was perfect (1.0) across articles, except articles #927, #2074 and #2118 where agreement was 0.75. The chance-corrected Gwet’s AC among raters similarly showed perfect agreement among raters across articles, except the three articles listed above with 0.64 agreement.

|  | Article #423 | | Article #523 | | Article #788 | | Article #927 | | Article #1274 | |
| --- | --- | --- | --- | --- | --- | --- | --- | --- | --- | --- |
|  | Coef | Probabilistic (Benchmark Interval) | Coef | Probabilistic (Benchmark Interval) | Coef | Probabilistic (Benchmark Interval) | Coef | Probabilistic (Benchmark Interval) | Coef | Probabilistic (Benchmark Interval) |
| Percent Agreement | **1.00** | **(0.80 – 1.00)** | **1.00** | **(0.80 – 1.00)** | **1.00** | **(0.80 – 1.00)** | **0.75** | **(0.60 – 0.80)** | **1.00** | **(0.80 – 1.00)** |
| Gwet’s AC | **1.00** | **(0.80 – 1.00)** | **1.00** | **(0.80 – 1.00)** | **1.00** | **(0.80 – 1.00)** | **0.64** | **(0.60 – 0.80)** | **1.00** | **(0.80 – 1.00)** |
|  | | | | | | | | |  |  |
|  | Article #1645 | | Article #1829 | | Article #1945 | | Article #2074 | | Article #2118 | |
|  | Coef | Probabilistic (Benchmark Interval) | Coef | Probabilistic (Benchmark Interval) | Coef | Probabilistic (Benchmark Interval) | Coef | Probabilistic (Benchmark Interval) | Coef | Probabilistic (Benchmark Interval) |
| Percent Agreement | **1.00** | **(0.80 – 1.00)** | **1.00** | **(0.80 – 1.00)** | **1.00** | **(0.80 – 1.00)** | **0.75** | **(0.60 – 0.80)** | **0.75** | **(0.60 – 0.80)** |
| Gwet’s AC | **1.00** | **(0.80 – 1.00)** | **1.00** | **(0.80 – 1.00)** | **1.00** | **(0.80 – 1.00)** | **0.64** | **(0.60 – 0.80)** | **0.64** | **(0.60 – 0.80)** |

**Benchmark scale**

**<0.0000 Poor**

**0.0000-0.2000 Slight**

**0.2000-0.4000 Fair**

**0.4000-0.6000 Moderate**

**0.6000-0.8000 Substantial**

**0.8000-1.0000 Almost Perfect**

- 1. **Q52 – type of outcome**

All articles reviewed were restricted to agreement on type of outcomes selected. Percent agreement of raters ranged from substantial agreement (0.67) to perfect (1.0) across articles. The chance-corrected Gwet’s AC among raters ranged from moderate (0.47) to perfect agreement among raters across articles. This was expected since raters could select from a wide range of service, implementation, and impact outcomes.

|  | Article #423 | | Article #523 | | Article #788 | | Article #927 | | Article #1274 | |
| --- | --- | --- | --- | --- | --- | --- | --- | --- | --- | --- |
|  | Coef | Probabilistic (Benchmark Interval) | Coef | Probabilistic (Benchmark Interval) | Coef | Probabilistic (Benchmark Interval) | Coef | Probabilistic (Benchmark Interval) | Coef | Probabilistic (Benchmark Interval) |
| Percent Agreement | **1.00** | **(0.80 – 1.00)** | **1.00** | **(0.80 – 1.00)** | **0.67** | **(0.60 – 0.80)** | **1.00** | **(0.80 – 1.00)** | **0.75** | **(0.60 – 0.80)** |
| Gwet’s AC | **1.00** | **(0.80 – 1.00)** | **1.00** | **(0.80 – 1.00)** | **0.52** | **(0.40 – 0.60)** | **1.00** | **(0.80 – 1.00)** | **0.64** | **(0.60 – 0.80)** |
|  | | | | | | | | |  |  |
|  | Article #1645 | | Article #1829 | | Article #1945 | | Article #2074 | | Article #2118 | |
|  | Coef | Probabilistic (Benchmark Interval) | Coef | Probabilistic (Benchmark Interval) | Coef | Probabilistic (Benchmark Interval) | Coef | Probabilistic (Benchmark Interval) | Coef | Probabilistic (Benchmark Interval) |
| Percent Agreement | **0.58** | **(0.40 – 0.60)** | **0.67** | **(0.60 – 0.80)** | **1.00** | **(0.80 – 1.00)** | **0.75** | **(0.60 – 0.80)** | **0.75** | **(0.60 – 0.80)** |
| Gwet’s AC | **0.47** | **(0.40 – 0.60)** | **0.52** | **(0.40 – 0.60)** | **1.00** | **(0.80 – 1.00)** | **0.64** | **(0.60 – 0.80)** | **0.64** | **(0.60 – 0.80)** |

**Benchmark scale**

**<0.0000 Poor**

**0.0000-0.2000 Slight**

**0.2000-0.4000 Fair**

**0.4000-0.6000 Moderate**

**0.6000-0.8000 Substantial**

**0.8000-1.0000 Almost Perfect**

**Conclusion**

Across all articles reviewed, several inter-rater reliability statistics were generated. The overall percent agreement was the overall percent agreement was **86%, implying almost perfect agreement** among raters. The overall chance-corrected Gwet’s agreement coefficient was also 86%, indicating almost perfect agreement among raters. Agreement coefficients differed by articles, and by the implementation strategies, methods, study types and types of outcomes, depending on the covariate restrictions applied.

**References**

1. StataCorp. 2015. *Stata Statistical Software: Release 14*. College Station, TX: StataCorp LP.
2. Li Gwet, K. (2008). Computing inter-rater reliability and its variance in the presence of high agreement. *British Journal of Mathematical and Statistical Psychology*, (61), 29–48. https://doi.org/10.1348/000711006X126600
3. Gwet, K. L. (2015). *On Krippendorff’s Alpha Coefficient*. Retrieved from http://www.agreestat.com/research_papers/onkrippendorffalpha_rev10052015.pdf
4. Wongpakaran, N., Wongpakaran, T., Wedding, D., & Gwet, K. L. (2013). A comparison of Cohen’s Kappa and Gwet’s AC1 when calculating inter-rater reliability coefficients: a study conducted with personality disorder samples. *BMC Medical Research Methodology*, *13*(1), 61. https://doi.org/10.1186/1471-2288-13-61
